# Supplementary material
Source: MDPI journal article supplement (https://www.mdpi.com/2313-0105/8/11/208)

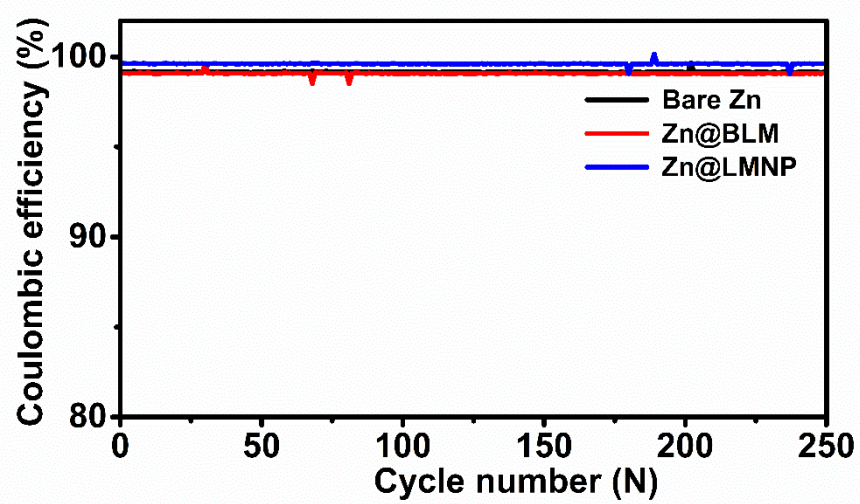

Figure S1. Coulombic efficiencies of the symmetric cells.

Supplement: s1 [file s1]
